# Supplementary material for: Enhanced Thermal Conductivity of Silicone Composites Filled with Few-Layered Hexagonal Boron Nitride
Source: MDPI journal article supplement (doi:10.3390/polym12092072), 2020-09-12
Supplement: s1 [file s1]

## **Supporting Information**

### **Enhanced thermal conductivity of silicone composites filled with few-layered hexagonal boron nitride**

**Wei-Cheng Cheng, Yi-Ting Hsieh and Wei-Ren Liu\***

*Department of Chemical Engineering, R&D Center for Membrane Technology,*

*Research Center for Circular Economy, Chung Yuan Christian University, 200*

*Chung Pei Road, Chungli District, Taoyuan City, 32023, Taiwan, R.O.C.*

*\*E-mail address: [WRLiu1203@gmail.com](mailto:WRLiu1203@gmail.com)*

*Tel: +886 3-265-4140; fax: +886 3-265-4199*

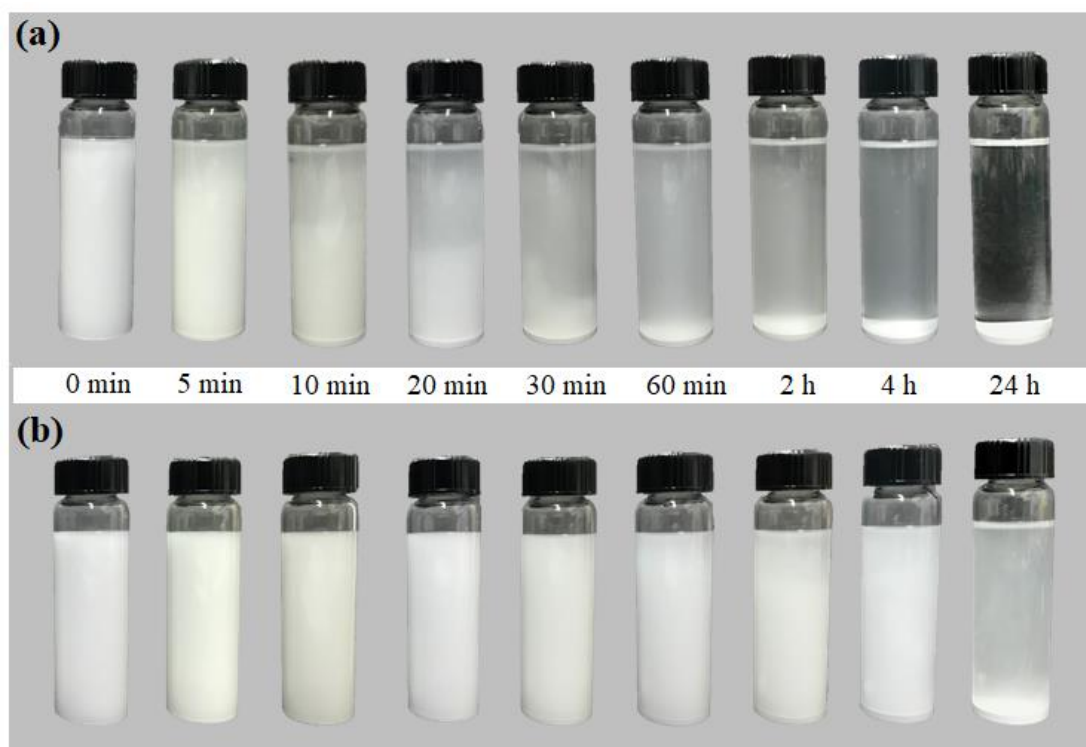

**Figure S1.** Photo images of (a) pristine h-BN and (b) FL-hBN solution after different resting time.

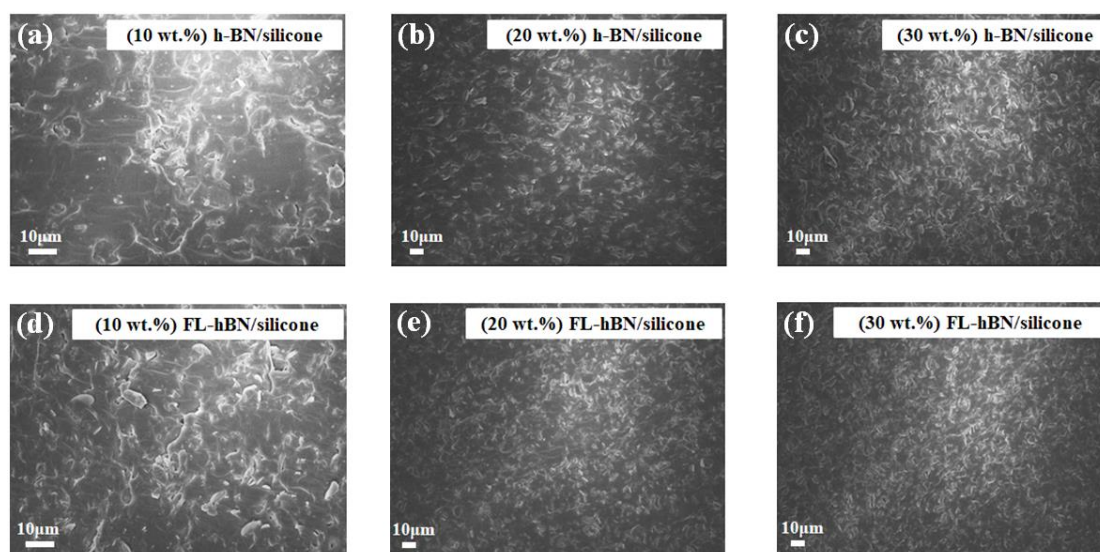

**Figure S2.** (a)-(c) SEM images of h-BN/silicone composites with powder loading of 10 wt%, 20 wt%, 30 wt% ; (d)-(f) SEM images of FL-hBN/silicone composites with powder loading of 10 wt%, 20 wt%, 30 wt%.

**Table S1.** FWHM, Lc and La of h-BN and FL-hBN.

|               | <b>FWHM(002)(°)</b> | <b>Lc (002)(Å)</b> | <b>La (100)(Å)</b> |
|---------------|---------------------|--------------------|--------------------|
| <b>h-BN</b>   | 0.3191              | 256.2              | 228.8              |
| <b>FL-hBN</b> | 0.4130              | 197.9              | 213.5              |
